# Supplementary material
Source: PubMed Central journal article supplement (PMC3920753)
Supplement: Supp_Fig2.pdf [file Supp_Fig2.pdf]

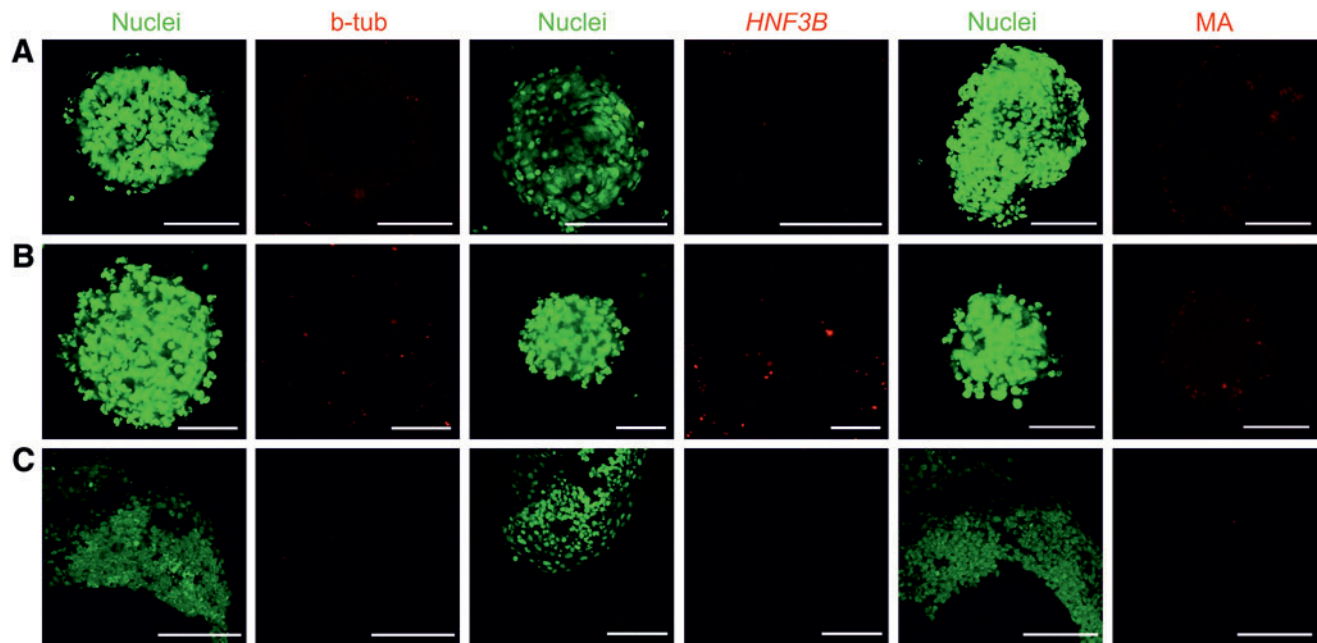

**SUPPLEMENTARY FIG. S2.** Immunostaining of three germ layer markers in the human pluripotent stem cell (hPSC) spheroids in 0.5% NFC hydrogel. iPS(IMR90)-4 cells cultured in 0.5 wt.% NFC hydrogel for 14 days (**A**) and WA07 cells for 14 days (**B**) and 26 days [**C**, 5 μm paraffin section] did not express detectable β-tubulin type III (b-tub), *HNF3B*, and muscle actin (MA). Scale bars, 100 μm (**A**, **C**) and 50 μm (**B**).
