# Supplementary material
Source: PubMed Central journal article supplement (PMC3920753)
Supplement: Supp_Fig3.pdf [file Supp_Fig3.pdf]

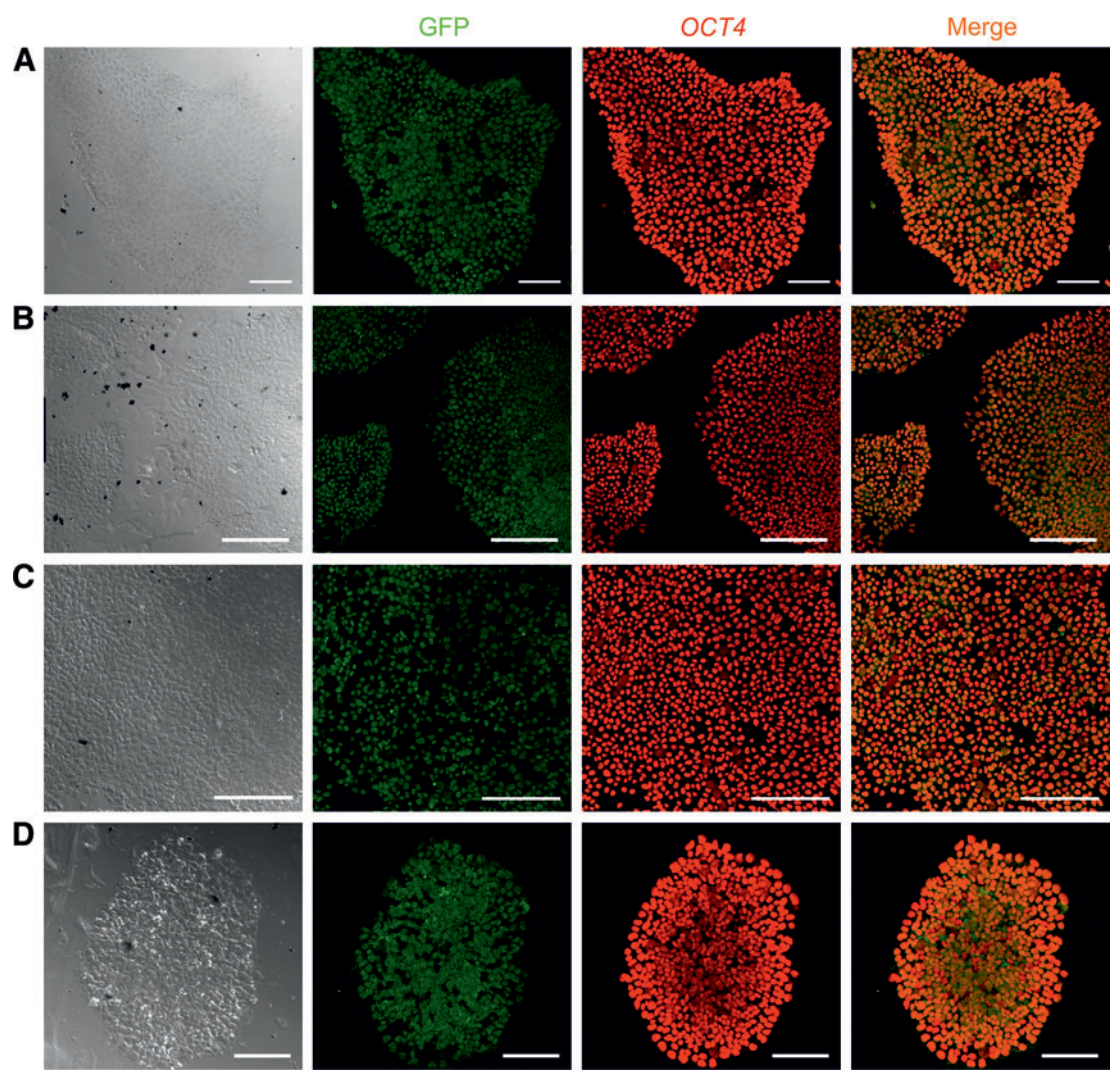

**SUPPLEMENTARY FIG. S3.** Transfer of H9-GFP 3D spheroids to 2D platforms. H9-GFP cells were first cultured in 0.5% NFC hydrogel for 9 days and then transferred to 2D platforms after a 24-h treatment with 300  $\mu\text{g}$  cellulase/mg cellulose at 37°C. The cells exhibit typical hPSC morphology and express the pluripotency marker *OCT4* on Matrigel-coated dishes (**A**), LN-511-coated dishes (**B**), LN-521-coated dishes (**C**), and VN-coated dishes (**D**). Scale bars, 100  $\mu\text{m}$  (**A**, **D**) and 200  $\mu\text{m}$  (**B**, **C**).
