# Supplementary material
Source: PubMed Central journal article supplement (PMC3920753)
Supplement: Supp_Fig4.pdf [file Supp_Fig4.pdf]

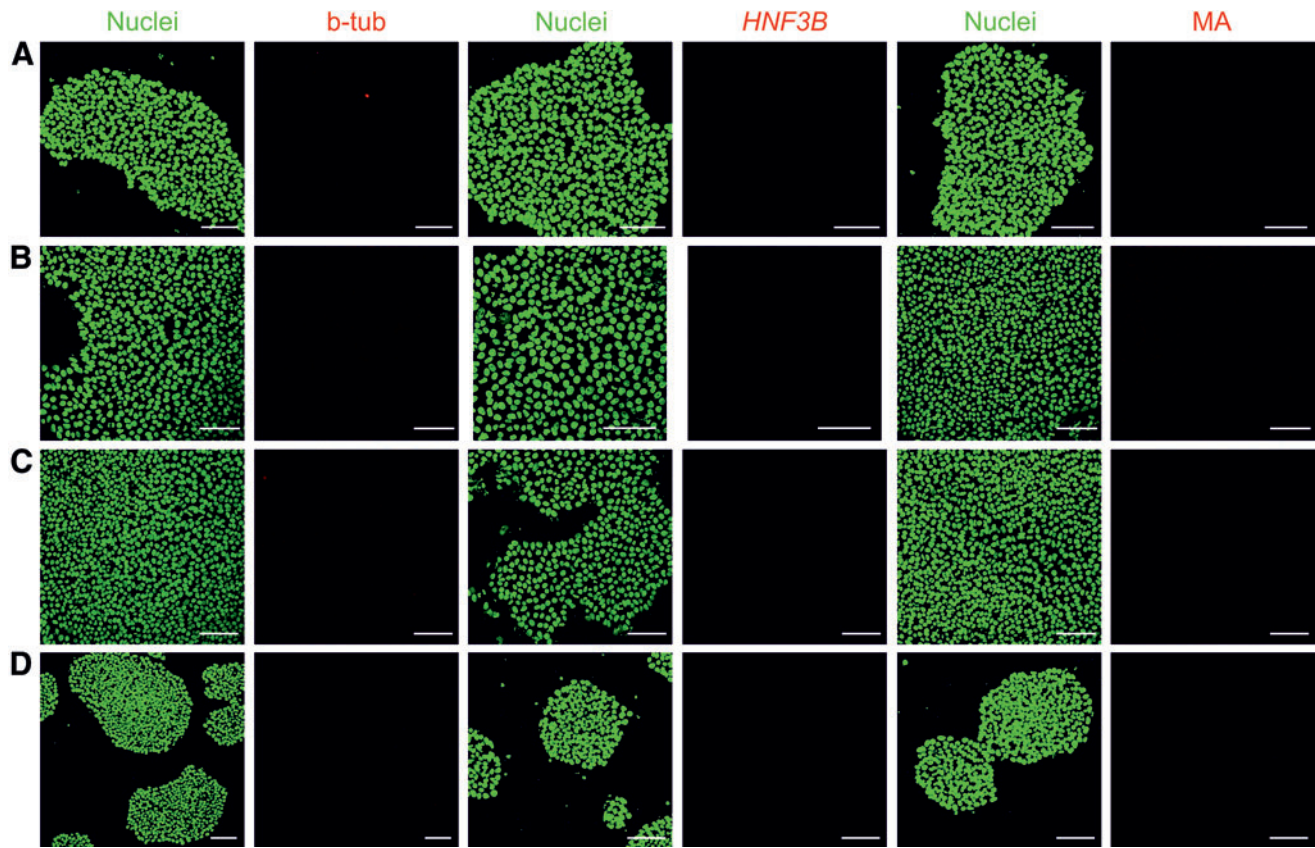

**SUPPLEMENTARY FIG. S4.** Transfer of WA07 3D spheroids to two-dimensional (2D) platforms. WA07 cells were first cultured in 0.5 wt.% NFC hydrogel for 9 days and then transferred to 2D platforms after a 24-h treatment with 300  $\mu$ g cellulase/mg cellulose at 37°C. The cells did not express  $\beta$ -tubulin type III (b-tub), *HNF3B*, and muscle actin (MA) on Matrigel-coated dishes (A), laminin-511 (LN-511)-coated dishes (B), LN-521-coated dishes (C), and vitronectin (VN)-coated dishes (D). Scale bars, 100  $\mu$ m.
