# Supplementary material
Source: PubMed Central journal article supplement (PMC3920753)
Supplement: Supp_Fig5.pdf [file Supp_Fig5.pdf]

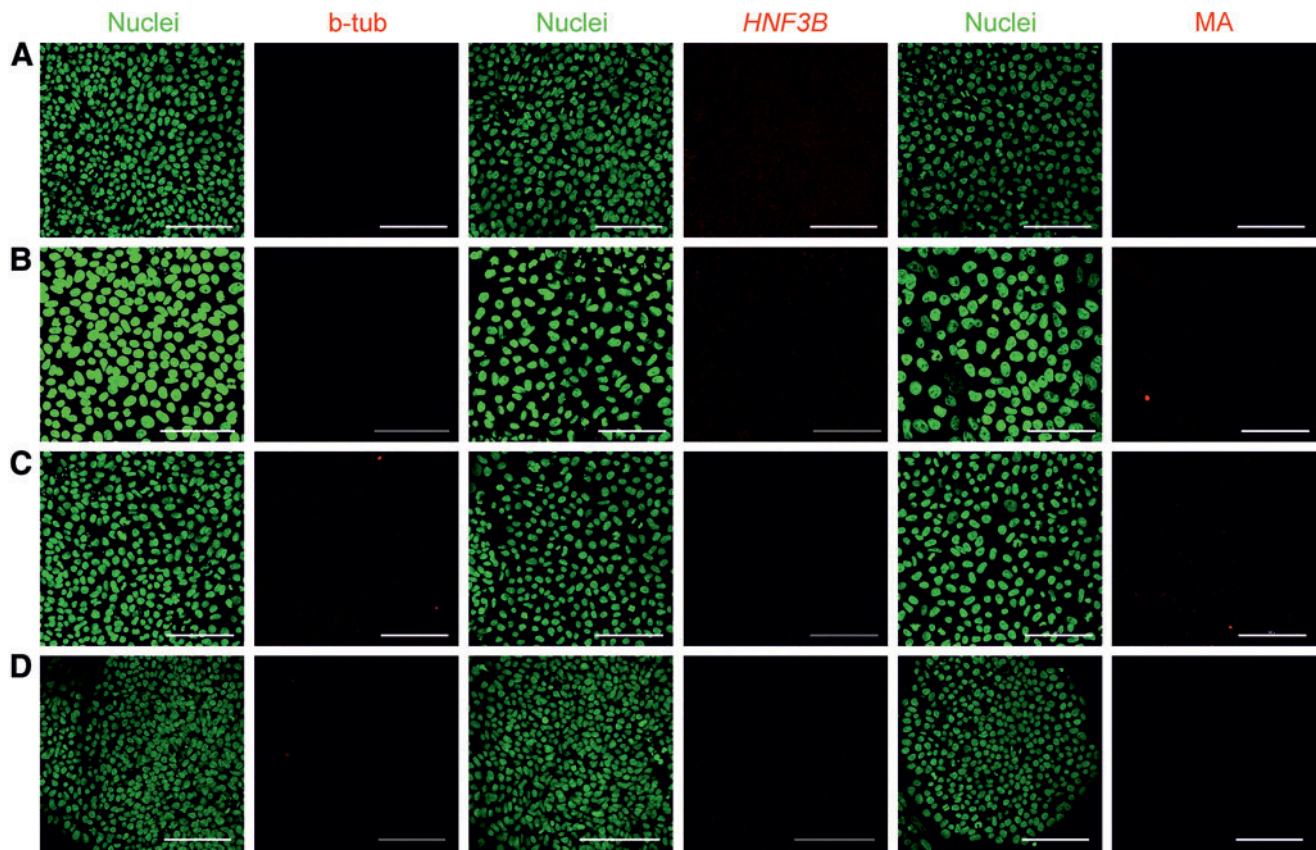

**SUPPLEMENTARY FIG. S5.** Transfer of iPS(IMR90)-4 3D spheroids to 2D platforms. iPS(IMR90)-4 cells were first cultured in 0.5 wt.% NFC hydrogel for 12 days and then transferred to 2D platforms after a 24-h treatment with 300  $\mu$ g cellulase/mg cellulose at 37°C. The cells did not express  $\beta$ -tubulin type III (b-tub), *HNF3B*, and muscle actin (MA) on Matrigel-coated dishes (A), LN-511-coated dishes (B), LN-521-coated dishes (C), and VN-coated dishes (D). Scale bars, 100  $\mu$ m.
