# Supplementary material
Source: PubMed Central journal article supplement (PMC3920753)
Supplement: Supp_Fig6.pdf [file Supp_Fig6.pdf]

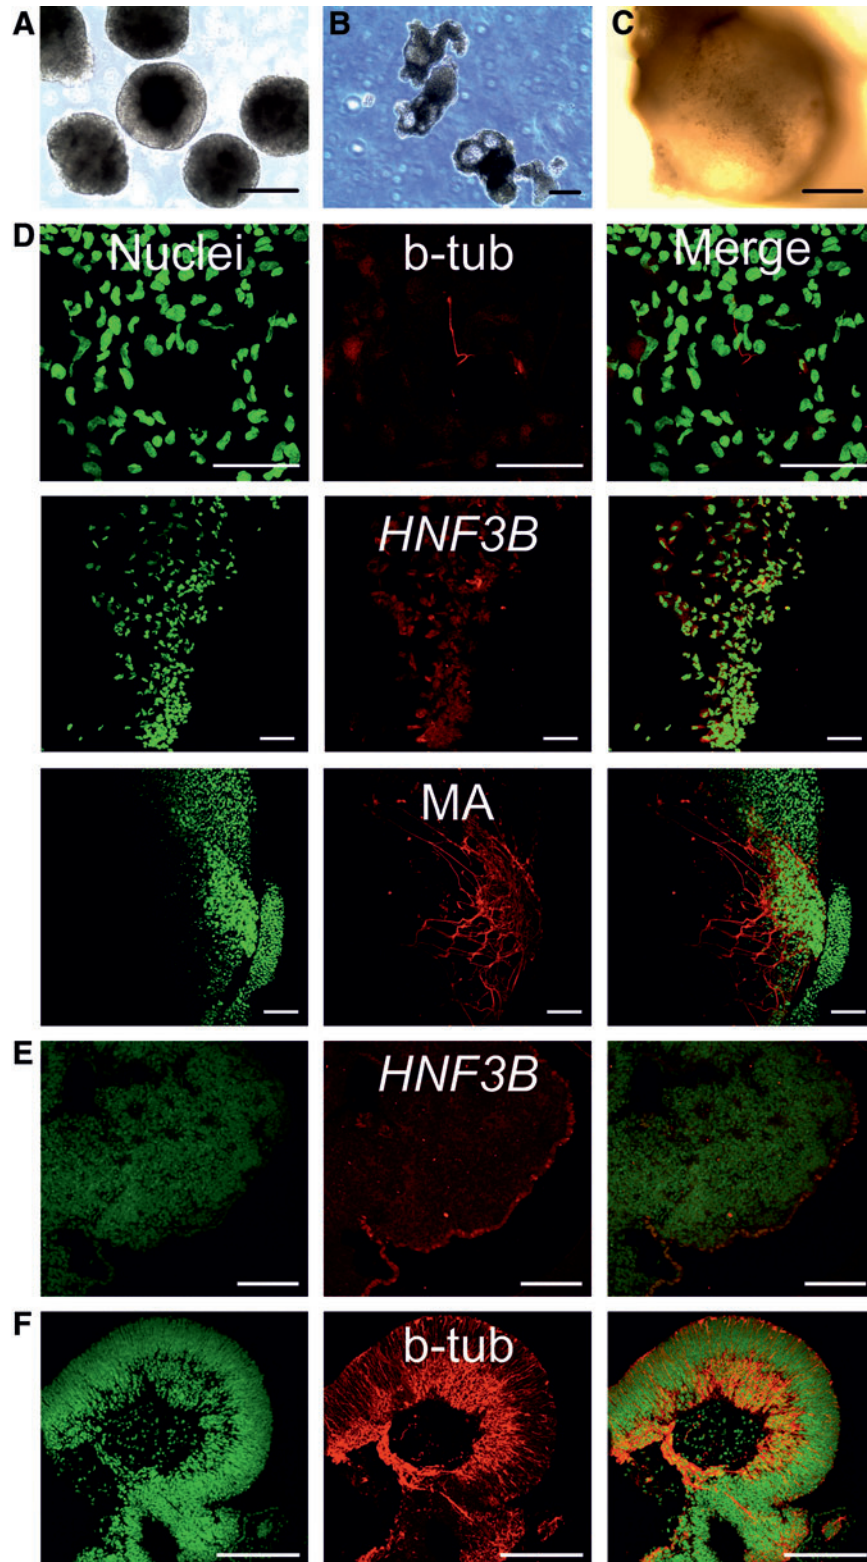

**SUPPLEMENTARY FIG. S6.** Embryoid body (EB) morphology and differentiation marker expression. iPS(IMR90)-4 cells were first cultured in 0.5 wt.% NFC hydrogel for 9 days and then underwent in vitro EB-mediated differentiation. The phase-contrast images of EBs show tightly packed morphology on day 1 (A), cystic, bright, and cavity structures on day 7 (B), and pigmented cells on day 27 (C). D, Cells dissociated from 2-week-old EBs were cultured on gelatin-coated dishes for 1 week and were then detected to express  $\beta$ -tubulin type III (b-tub), *HNF3B*, and muscle actin (MA). (E, F) Immunohistochemistry of 2-week-old (E) and 4-week-old EBs [(F), 5  $\mu$ m paraffin section]. Scale bars, 200  $\mu$ m (A–C, F) and 100  $\mu$ m (D, E).
