# Supplementary material
Source: PubMed Central journal article supplement (PMC3920753)
Supplement: Supp_Fig7.pdf [file Supp_Fig7.pdf]

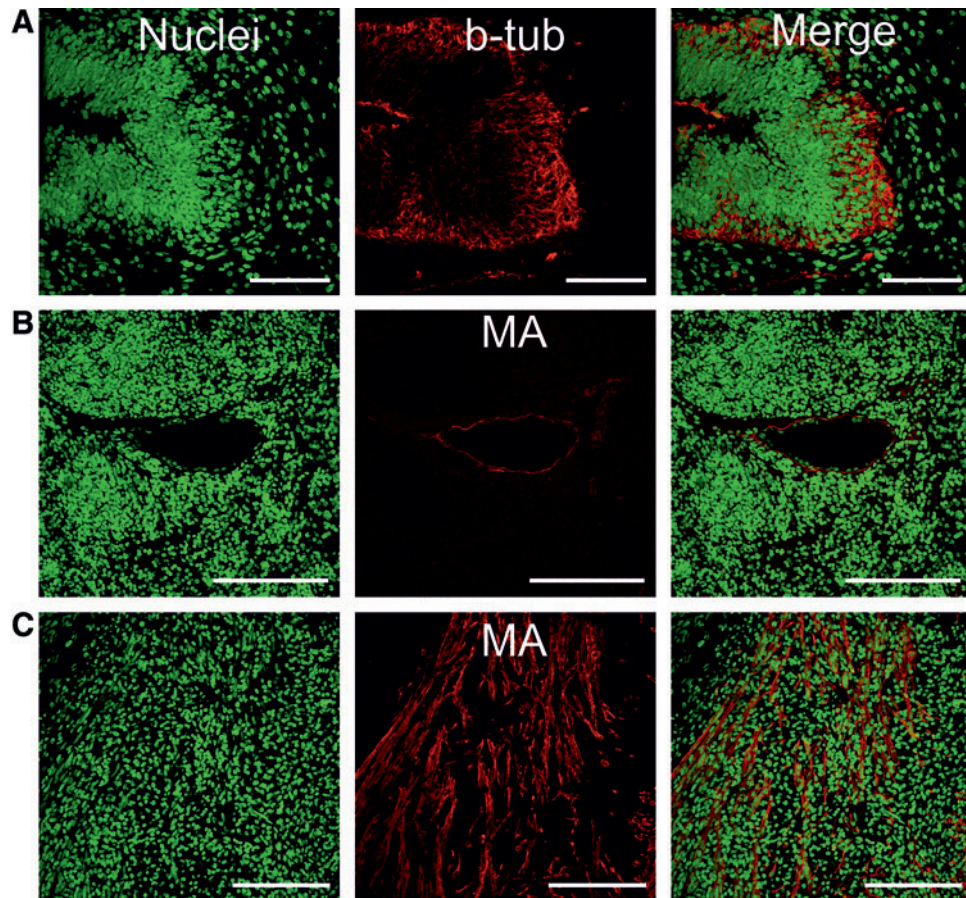

**SUPPLEMENTARY FIG. S7.** Differentiation marker expression in teratoma. Immunofluorescence in sections (5  $\mu\text{m}$ ) of 6-week-old teratoma derived from WA07 cells that had previously been cultured in 0.5 wt.% NFC hydrogel for 26 days shows the expression of  $\beta$ -tubulin type III (b-tub) (A) and muscle actin (MA) (B, C). Scale bars = 100  $\mu\text{m}$  (A) and 200  $\mu\text{m}$  (B, C).
